# Supplementary material for: Long-Term Spatio-Temporal Trends of Organotin Contaminations in the Marine Environment of Hong Kong
Source: PLoS One. 2016 May 13;11(5):e0155632. doi: 10.1371/journal.pone.0155632 (PMC4866715; doi:10.1371/journal.pone.0155632)
Supplement: S9 Table — (DOCX) [file pone.0155632.s009.docx]

**S9 Table. Chronic and sub-chronic toxicity values of body concentration of tributyltin (TBT; ng g-1 dry weight; arranged in ascending order) for molluscs, which were adopted from Appendix 4 of Leung et al. (2006) with modifications.** Values used in the construction of species sensitivity distribution (Fig 4a) were marked with asterisks (*) and bolded. N.A. means not available.

| **Taxa** | **Species** | **Chronic value**  **(ng TBT L-1)** | **Exposure duration and method** | **Biocon-**  **centration factor (BCF)** | **Estimated body concentration (ng g-1 dry weight as TBT)** | **Type of chronic value** | **End point of toxicity** |
| --- | --- | --- | --- | --- | --- | --- | --- |
| Gastropod | *Littorina littorea* | 4.9 a | Field study | 34600 b | 168.6 | LOEC | Female developed intersex c |
| Gastropod | *Nucella lapillus* | 2.4 a | Field study | 100000 d | 243.7 | LOEC | Females lost weight and developed imposex e |
| Gastropod | *Nucella lapillus* | 4.9 a | 8 days | 100000 d | 487.4 | LOEC | Females lost weight and developed imposex f |
|  |  |  |  |  | **271.56 *** | **Geometric mean of above three entries** | |
| Gastropod | *Reishia clavigera* v | N.A. | Field study | N.A. | 10−20 ng TBTCl g-1 wet tissue u | LOEC | Female developed imposex g |
| Gastropod | *Reishia clavigera* v | ca. 2.4 a | 85 days | 5000 – 10000 h | ca. 20 ng TBTCl g-1 wet tissue u | LOEC | Female developed imposex h |
| Gastropod | *Hinia incrassata* | 3.7 a | Field study | 122000 i | 446.0 | LOEC | Imposex development i |
| Bivalve | *Ruditapes decussata* | 219.3 a | 7 days exposure | 12000 j | **2631.9 *** | LOEC | Elevation in the NADPH cytochrome (P450) reductases and decrease in NADH cytochrome (b5) reductases k |
| Bivalve | *Crassostrea virginica* | 73.1 a | 9 weeks flow through experiment | 49000 l | **3582.4 *** | LOEC | Decrease resistance against bacterial challenge m |
| Bivalve | *Mytilus edulis* | 12.2 a | 32 days | 400000 n | 4915.3 | NOEC | Activity of hemocyte and membrane injury o |
| Bivalve | *Mytilus edulis* | 13.2 a | 15 days | 400000 n | 5263.9 | EC10 | Shell growth retardation p |
| Bivalve | *Mytilus edulis* | 20 | 60 days | 400000 n | 8000 | LOEC | Reduced shell length q |
|  |  |  |  |  | **5915.38 *** | **Geometric mean of above three entries** | |
| Bivalve | *Scrobicularia plana* | 121.8 a | 10 days exposure | 50000 r | **6092.4 *** | LOEC | Larvae reduced shell growth and survivorship s |
| Bivalve | *Crassostrea gigas* | 48.7 a | Field study | 310000 l | **15097 *** | LOEC | Growth inhibition t |

a Converted to ng TBT L-1

b Kure and Depledge (1994)

c Oehlmann (2004)

d Bryan et al. (1993)

e Gibbs et al. (1987)

f Davies et al. (1997)

g Horiguchi et al. (1994)

h Horiguchi et al. (1995)

i Oehlmann et al. (1998)

j Morcillo and Porte (2000)

k Sole (2000)

l Roberts et al. (1987)

m Fisher et al. (1999)

n Salazar and Salazar (1991)

o St-Jean et al. (2002)

p Stenalt et al. (1998)

q Huang and Yong (1995)

r Bryan and Gibbs (1991)

s Ruiz et al. (2005)

t Batley et al. (1989)

u Values transformed into 33−67 and 67 ng TBTCl g-1 dry weight respectively, assuming the moisture content in the tissue was 70%.

v Previously named as *Thais clavigera* (see Claremont et al., 2013)
